# Supplementary material
Source: PubMed Central journal article supplement (PMC3255748)
Supplement: supp_78.2.471_AEM5663-11_FigS1-S2.pdf [file supp_78.2.471_AEM5663-11_FigS1-S2.pdf]

**A** ATCC 17978 IS*Aba11* context

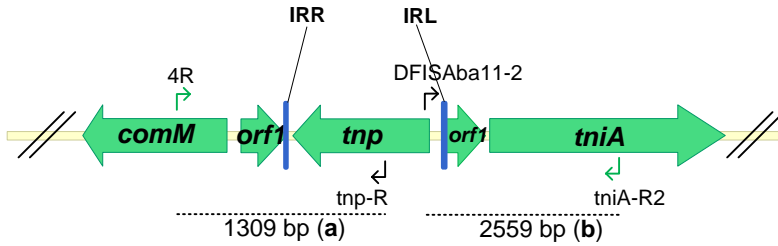

**B** pDSISAba11Gm

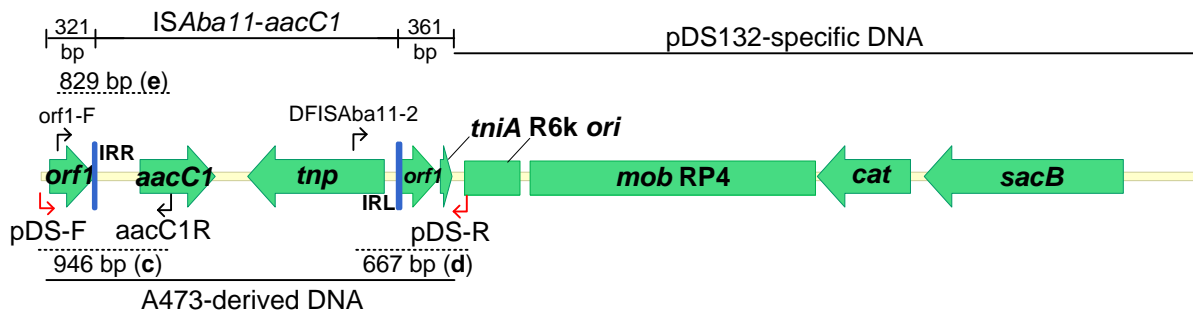

**C**

| Outcome                                     | No. of colonies | Expected PCR results |              |                               |                   |   |   |   |   |
|---------------------------------------------|-----------------|----------------------|--------------|-------------------------------|-------------------|---|---|---|---|
|                                             |                 | <i>sacB</i>          | <i>aacC1</i> | <i>tnp</i> <sub>ISAba11</sub> | <i>oxa51-like</i> | a | b | c | d |
| 5'- <i>orf1</i> single-HR                   | 19              | +                    | +            | +                             | +                 | + | - | + | + |
| 3'- <i>orf1</i> single-HR                   | 1               | +                    | +            | +                             | +                 | - | + | + | + |
| Transposition into <i>orf1</i> or double-HR | 0               | -                    | +            | +                             | +                 | + | + | + | + |
| None of the above                           | 8               | +                    | +            | +                             | +                 | - | - | + | + |
| <b>Controls</b>                             |                 |                      |              |                               |                   |   |   |   |   |
| A424                                        |                 | -                    | -            | -                             | +                 | - | - | - | - |
| A473                                        |                 | -                    | ND           | +                             | +                 | - | + | - | - |
| S17.1λpir/pDSISAba11Gm                      |                 | +                    | +            | +                             | -                 | - | - | + | + |
| PCR negative control                        |                 | -                    | -            | -                             | -                 | - | - | - | - |

**Fig. S1. Schematic drawings of the IS*Aba11*-bearing locus in *Acinetobacter baumannii* strain ATCC 17978 and the plasmid pDSISAba11Gm and PCR analysis data on 28 further gentamicin resistant colonies. (A)** Genetic context of the IS*Aba11* element in *A. baumannii* strain ATCC 17978 showing its location within a Tn*AbaR orf1* gene. **(B)** Linearized map of pDSISAba11Gm showing the extent of A473-derived DNA. The short 321 bp and 361 bp sequences flanking IS*Aba11* offer the potential for targeted homologous recombination with matching sequences in *A. baumannii* A424. **(C)** Results of PCR analysis on 28 gentamicin resistant colonies obtained following transfer of pDSISAba11Gm into *A. baumannii* A424 during a subsequent conjugation experiment. Primers used for the PCR assays were as follows: *sacB*, *sacB-F/sacB-R*; *aacC1*, *aacC1F/aacC1R*; *tnp*<sub>ISAba11</sub>, *tnp-F/tnp-R*; *oxa51-like*, *oxa51a/oxa51b*. Primers shown in red are specific for pDS132 only. Results shown were obtained with limiting amounts of template DNA. When excess template DNA was used, weak amplicon-a and amplicon-b bands were frequently observed for colonies that otherwise tested negative suggesting low frequency presence of genomes within the population sampled exhibiting alternative recombination patterns. This would be consistent with spontaneous low frequency excision and reintegration of pDSISAba11Gm.

| IS Name  | IS family | Host strain                               | Phylum              | IS length | TIR  | DR | Tnp length | Score | e-value | Identities   | IRL                                   | Motif |
|----------|-----------|-------------------------------------------|---------------------|-----------|------|----|------------|-------|---------|--------------|---------------------------------------|-------|
| ISAbal1  | ISAbal1   | <i>A. baumannii</i> ATCC 17978            | Proteobacteria      | 1101      | 13   | 5  | 325        | 1547  | 0.0     | 320/320 100% | <b>taggacttacgca</b>                  | HHEK  |
| ISAcma22 | ISAbal1   | <i>A. marina</i> MBIC11017                | Cyanobacteria       | 1251      | 22/2 | 5  | 350        | 785   | 1e-100  | 158/313 45%  | <b>tagaggttacgcattgacagaa</b>         |       |
| ISAcma42 | ISAbal1   | <i>A. marina</i> MBIC11017                | Cyanobacteria       | 1140      | 18/1 | 5  | 308        | 556   | 1e-66   | 116/295 36%  | <b>caggactaacgcattgaca</b>            |       |
| ISPna6   | ISAbal1   | <i>P. naphthalenivorans</i> CJ2 pPNAP04   | Proteobacteria      | 1134      | 22/1 | 0  | 326        | 885   | 3e-116  | 162/319 49%  | aactt <b>taggacttacgcattga</b>        |       |
| ISCysp21 | ISAbal1   | <i>Cyanothece</i> sp. PCC 8801 pP880101   | Cyanobacteria       | 1139      | 19   | 0  | 321        | 730   | 6e-93   | 145/316 44%  | <b>taggacttacgcattgaca</b>            | HEK   |
|          |           | <i>Cyanothece</i> sp. PCC 7424 pP742402   | Cyanobacteria       | 1139      | 23/1 | 0  | 306        | 649   | 7e-81   | 129/293 44%  | t <b>taggagatacgcattgacagaa</b>       |       |
|          |           | <i>Cyanothece</i> sp. PCC 7822 pP782201   | Cyanobacteria       | 1151      | 23/4 | 0  | 308        | 648   | 2e-80   | 128/305 42%  | <b>taggagatacgcattgacagaatga</b>      |       |
|          |           | <i>Crocospaera watsonii</i> WH 8501 A     | Cyanobacteria       | 1136      | 20/2 | 0  | 322        | 636   | 9e-79   | 132/320 41%  | t <b>tagagagtttcgcattgacagaa</b>      |       |
|          |           | <i>Crocospaera watsonii</i> WH 8501 B     | Cyanobacteria       | 1138      | 21/2 | 0  | 271        | 619   | 2e-76   | 106/267 41%  | t <b>taggagtttcgcattgacaaaa</b>       | EHEK  |
| ISMhu9   | IS701     | <i>Methanospirillum hungatei</i> JF-1     | Euryarchaeota       | 1085      | 15   | 3  | 328        | 472   | 5e-54   | 118/330 36%  | a <b>taggagttacgcag</b>               |       |
|          |           | <i>Meiothermus silvanus</i> DSM 9946      | Deinococcus-Thermus | 1092      | 16/1 | 5  | 343        | 467   | 5e-53   | 106/267 40%  | <b>taggagttacgcagttg</b>              |       |
|          |           | <i>Legionella pneumophila</i> str. Lens   | Proteobacteria      | 1070      | 17/1 | 3  | 331        | 425   | 5e-47   | 96/300 32%   | tgacctat <b>tacggtt</b>               |       |
|          |           | <i>Gemmata obscuriglobus</i> UQM 2246     | Planctomycetes      | 1068      | 13/3 | 1  | 327        | 355   | 2e-37   | 89/284 34%   | c <b>taggacttacgtagttg</b>            | EK    |
|          |           | <i>Chloroflexus aurantiacus</i> J-10-f1   | Chloroflexi         | 1306      | 27/4 | 4  | 337        | 303   | 3e-29   | 90/296 30%   | <b>aggagttacgcagtt</b>                |       |
| ISPlag1  | IS701     | <i>Planktothrix agardhii</i> NIVA-CYA     | Cyanobacteria       | 1060      | 18/1 | 2  | 332        | 326   | 1e-32   | 93/308 30%   | <b>aggacttacgcaggcacagtatatatagtg</b> |       |
|          |           | <i>Spirosoma linguale</i> DSM 74 pSLIN01  | Bacteroidetes       | 1084      | 15   | 3  | 339        | 282   | 3e-26   | 94/312 30%   | tatat <b>taggacttacgca</b>            |       |
|          |           | <i>Synechococcus</i> sp. PCC 7335         | Cyanobacteria       | 1118      | 15   | 1  | 358        | 269   | 3e-24   | 74/290 26%   | a <b>taggacttacgcag</b>               |       |
|          |           | <i>Parachlamydia acanthamoebae</i> UV7    | Chlamydiae          | 1187      | 12/1 | 5  | 255        | 263   | 6e-24   | 70/227 31%   | actcacc <b>tacgcaaaa</b>              |       |
|          |           | <i>Salinibacter ruber</i> M8 pSR84        | Bacteroidetes       | 1283      | 13/1 | 5  | 243        | 259   | 4e-23   | 78/293 27%   | <b>taggacttacgca</b>                  |       |
|          |           | <i>Roseiflexus castenholzii</i> DSM 13941 | Chloroflexi         | 1090      | 13   | 0  | 348        | 234   | 9e-19   | 87/328 27%   | actcacc <b>tacgcag</b>                |       |
|          |           | <i>Methylobacterium album</i> BG8         | Proteobacteria      | 1251      | 16/1 | 1  | 356        | 221   | 1e-17   | 75/311 24%   | <b>caggacttacgca</b>                  |       |
|          |           | <i>Methylobacter tundripaludum</i> SV96   | Proteobacteria      | 1283      | 14/1 | 0  | 243        | 184   | 4e-13   | 87/271 35%   | cttattaactgatg <b>tacgcag</b>         |       |
|          |           | <i>Rhodothermus marinus</i> SG0.5JP17-172 | Bacteroidetes       | 891       | 11   | 0  | 186        | 160   | 3e-10   | 44/132 33%   | <b>taggacttacgca</b>                  |       |
|          |           | <i>Methanosarcina barkeri</i> str. Fusaro | Euryarchaeota       | 1090      | 20/2 | 1  | 351        | 312   | 7e-32   | 71/175 41%   | <b>taggacttacgca (IRR missing)</b>    |       |
|          |           | <i>Methanosarcina acetivorans</i> C2A     | Euryarchaeota       | NK        | NK   | NK | 195        | 264   | 3e-25   | 59/135 44%   | t <b>taggacttacgca (IRR missing)</b>  |       |
|          |           | <i>Legionella longbeachae</i> D-4968      | Proteobacteria      | NK        | NK   | NK | 166        | 366   | 1e-38   | 92/263 35%   | NK                                    |       |
|          |           | <i>Legionella longbeachae</i> NSW150      | Proteobacteria      | NK        | NK   | NK | 324        | 359   | 2e-37   | 97/285 34%   | NK                                    |       |

**Fig. S2. List of putative insertion sequence elements encoding BlastP homologs of Tnp<sub>ISAbal1</sub>, which possess as a minimum the EK residues of the ISAbal1 family HHEK motif.** Features of these elements and associated transposases are as indicated. Score, e-value and identities data refer to results of BlastP analysis against Tnp<sub>ISAbal1</sub>. Only elements which have been archived in ISfinder carry assigned names and families. Bases shown in bold within the identified IRL sequences are conserved in the majority of sequences. NK, not known.
