# Supplementary material
Source: PubMed Central journal article supplement (PMC3255748)
Supplement: supp_78.2.471_AEM5663-11_ST1-ST5.pdf [file supp_78.2.471_AEM5663-11_ST1-ST5.pdf]

**Table S1. Bacterial strains and plasmids used in this study**

| Strain or plasmid         | Genotype or relevant characteristics <sup>a</sup>                                                                                                                            | Source or reference |
|---------------------------|------------------------------------------------------------------------------------------------------------------------------------------------------------------------------|---------------------|
| <b>Strains</b>            |                                                                                                                                                                              |                     |
| <i>E. coli</i>            |                                                                                                                                                                              |                     |
| DH5α                      | F <sup>+</sup> , φ80 <i>lacZ</i> ΔM15 Δ( <i>lacZYA-argF</i> )U169 <i>deoR recA1 endA1 hsdR17</i> (rK <sup>-</sup> , mK <sup>+</sup> ) <i>phoA supE44 λ<sup>-</sup> thi-1</i> | Invitrogen          |
| CC118 λ-pir               | Δ( <i>ara-leu</i> ) <i>araD</i> Δ <i>lacX74 galE galK phoA20 thi-1 rpsE rpoB argE(Am) recA1 λ pir</i>                                                                        | (3)                 |
| S17.1 λ-pir               | <i>hsdR recA pro</i> RP4-2 (Tc::Mu; Km::Tn7)( λ <i>pir</i> )                                                                                                                 | (9)                 |
| <i>A. baumannii</i>       |                                                                                                                                                                              |                     |
| A424                      | Clinical isolate                                                                                                                                                             | QMC <sup>a</sup>    |
| A473                      | Clinical isolate                                                                                                                                                             | (7)                 |
| ATCC 19606                | Clinical isolate                                                                                                                                                             | SGSC <sup>a</sup>   |
| <b>Plasmids</b>           |                                                                                                                                                                              |                     |
| pGEM <sup>®</sup> -T Easy | Cloning vector; Ap <sup>r</sup>                                                                                                                                              | Promega             |
| pUC18R6KminiTn7T-Gm       | Ap <sup>r</sup> ; source of Gm <sup>r</sup> cassette                                                                                                                         | (1)                 |
| pISAbal1                  | 1.7 kb fragment containing entire <i>ISAbal1</i> inserted into pGEM <sup>®</sup> -T Easy                                                                                     | This study          |
| pISAbal1Gm                | <i>aacC1</i> cassette inserted downstream of <i>ISAbal1</i> into pISAbal1                                                                                                    | This study          |
| pDS132                    | Suicide vector, R6K <i>ori</i> , <i>mobRP4</i> , <i>cat</i> , <i>sacB</i>                                                                                                    | (5)                 |
| pDISAbal1Gm               | <i>aacC1</i> -tagged <i>ISAbal1</i> inserted into pDS132                                                                                                                     | This study          |

<sup>a</sup> Abbreviations: QMC, Queen's Medical Centre, Nottingham; SGSC, *Salmonella* Genetic Stock Centre; Ap<sup>r</sup>, ampicillin resistance; Gm<sup>r</sup>, gentamicin resistance.

**Table S2. ISAba11 and TnAbaR PCR survey results for the 148 strains representative of ≥19 Acinetobacter species investigated experimentally in this study**

| Strain | Species             | <i>tnp</i> <sub>ISAba11</sub> <sup>a</sup> | ISAba11 <sup>a</sup> | <i>tniA</i> <sup>a</sup> | <i>rpoB</i> <sup>a</sup> |
|--------|---------------------|--------------------------------------------|----------------------|--------------------------|--------------------------|
| A1     | <i>A. baumannii</i> | -                                          | -                    | +                        | +                        |
| A13    | <i>A. baumannii</i> | -                                          | -                    | -                        | +                        |
| A14    | <i>A. baumannii</i> | -                                          | -                    | +                        | +                        |
| A20    | <i>A. baumannii</i> | -                                          | -                    | -                        | +                        |
| A25    | <i>A. baumannii</i> | -                                          | -                    | +                        | +                        |
| A37    | <i>A. baumannii</i> | -                                          | -                    | -                        | +                        |
| A47    | <i>A. baumannii</i> | -                                          | -                    | +                        | ND                       |
| A52    | <i>A. baumannii</i> | -                                          | -                    | -                        | ND                       |
| A63    | <i>A. baumannii</i> | -                                          | -                    | +                        | +                        |
| A92    | <i>A. baumannii</i> | -                                          | -                    | -                        | +                        |
| A94    | <i>A. baumannii</i> | -                                          | -                    | -                        | +                        |
| A97    | <i>A. baumannii</i> | -                                          | -                    | -                        | +                        |
| A167   | <i>A. baumannii</i> | -                                          | -                    | -                        | +                        |
| A186   | <i>A. baumannii</i> | -                                          | -                    | +                        | ND                       |
| A187   | <i>A. baumannii</i> | -                                          | -                    | -                        | ND                       |
| A230   | <i>A. baumannii</i> | -                                          | -                    | +                        | ND                       |
| A329   | <i>A. baumannii</i> | -                                          | -                    | -                        | ND                       |
| A335   | <i>A. baumannii</i> | -                                          | -                    | +                        | ND                       |
| A343   | <i>A. baumannii</i> | -                                          | -                    | +                        | ND                       |
| A365   | <i>A. baumannii</i> | -                                          | -                    | +                        | ND                       |
| A367   | <i>A. baumannii</i> | -                                          | -                    | -                        | ND                       |
| A297   | <i>A. baumannii</i> | -                                          | -                    | +                        | +                        |
| A332   | <i>A. baumannii</i> | -                                          | -                    | +                        | +                        |
| A369   | <i>A. baumannii</i> | -                                          | -                    | +                        | +                        |
| A371   | <i>A. baumannii</i> | -                                          | -                    | +                        | +                        |
| A377   | <i>A. baumannii</i> | -                                          | -                    | -                        | +                        |
| A379   | <i>A. baumannii</i> | -                                          | -                    | -                        | ND                       |
| A380   | <i>A. baumannii</i> | -                                          | -                    | +                        | ND                       |
| A384   | <i>A. baumannii</i> | -                                          | -                    | +                        | +                        |
| A387   | <i>A. baumannii</i> | -                                          | -                    | +                        | +                        |
| A388   | <i>A. baumannii</i> | -                                          | -                    | +                        | +                        |
| A390   | <i>A. baumannii</i> | -                                          | -                    | +                        | ND                       |
| A392   | <i>A. baumannii</i> | -                                          | -                    | +                        | +                        |
| A397   | <i>A. baumannii</i> | -                                          | -                    | -                        | ND                       |
| A401   | <i>A. baumannii</i> | -                                          | -                    | -                        | +                        |
| A418   | <i>A. baumannii</i> | -                                          | -                    | +                        | +                        |
| A424   | <i>A. baumannii</i> | -                                          | -                    | +                        | +                        |
| A442   | <i>A. baumannii</i> | -                                          | -                    | +                        | +                        |
| A443   | <i>A. baumannii</i> | -                                          | -                    | +                        | +                        |
| A457   | <i>A. baumannii</i> | -                                          | -                    | -                        | +                        |
| A472   | <i>A. baumannii</i> | -                                          | -                    | +                        | +                        |
| A473   | <i>A. baumannii</i> | +                                          | +                    | +                        | +                        |
| A474   | <i>A. baumannii</i> | -                                          | -                    | +                        | ND                       |
| A479   | <i>A. baumannii</i> | +                                          | -                    | -                        | ND                       |
| A480   | <i>A. baumannii</i> | -                                          | -                    | +                        | ND                       |

|        |                                               |   |   |   |    |
|--------|-----------------------------------------------|---|---|---|----|
| A481   | <i>A. baumannii</i>                           | - | - | - | ND |
| A482   | <i>A. baumannii</i>                           | - | - | + | ND |
| AB13   | <i>A. baumannii</i>                           | - | - | + | ND |
| AB14   | <i>A. baumannii</i>                           | - | - | + | ND |
| AS15   | <i>A. baumannii</i>                           | - | - | + | ND |
| AB16   | <i>A. baumannii</i>                           | - | - | + | ND |
| AB17   | <i>A. baumannii</i>                           | - | - | + | ND |
| AB18   | <i>A. baumannii</i>                           | - | - | - | ND |
| AB20   | <i>A. baumannii</i>                           | - | - | + | +  |
| AS20   | <i>A. baumannii</i>                           | - | - | + | +  |
| AB21   | <i>A. baumannii</i>                           | - | - | + | ND |
| AB22   | <i>A. baumannii</i>                           | - | - | + | ND |
| AL7    | <i>A. baumannii</i>                           | + | - | - | +  |
| AS27   | <i>A. baumannii</i>                           | - | - | - | +  |
| AS42   | <i>A. baumannii</i>                           | + | + | - | +  |
| KR1774 | <i>A. baumannii</i>                           | - | - | - | +  |
| AS44   | <i>A. baumannii</i>                           | - | - | - | +  |
| KR175  | <i>A. baumannii</i>                           | - | - | + | +  |
| AS45   | <i>A. baumannii</i>                           | - | - | - | +  |
| HPA10  | <i>A. bayli</i> / <i>A. genomospecies 11</i>  | - | - | - | +  |
| HPA16  | <i>A. bayli</i> / <i>A. genomospecies 11</i>  | - | - | - | +  |
| HPA22  | <i>A. berezinae</i>                           | - | - | - | +  |
| HPA26  | <i>A. berezinae</i>                           | - | - | - | +  |
| HPA3   | <i>A. beijerinckii</i>                        | + | + | - | +  |
| HPA21  | <i>A. calcoaceticus</i>                       | - | - | - | +  |
| HPA18  | <i>A. genomospecies 13</i>                    | - | - | - | +  |
| HPA23  | <i>A. genomospecies 13</i>                    | + | + | - | +  |
| HPA1   | <i>A. genomospecies 16</i>                    | - | - | - | +  |
| AS46   | <i>A. genomospecies 15TU</i>                  | + | + | + | +  |
| AS47   | <i>A. genomospecies 15TU</i>                  | + | + | - | +  |
| HPA8   | <i>A. genomospecies 15TU</i>                  | + | + | - | +  |
| HPA11  | <i>A. gyllenbergii</i>                        | + | + | - | +  |
| HPA29  | <i>A. haemolyticus</i>                        | - | - | - | +  |
| HPA30  | <i>A. haemolyticus</i>                        | + | - | - | +  |
| HPA34  | <i>A. haemolyticus</i>                        | + | - | - | +  |
| AL1    | <i>A. johnsonii</i>                           | + | + | - | +  |
| AS24   | <i>A. johnsonii</i>                           | + | + | - | +  |
| HPA6   | <i>A. johnsonii</i>                           | - | - | - | +  |
| HPA14  | <i>A. johnsonii</i>                           | + | + | - | +  |
| HPA17  | <i>A. johnsonii</i>                           | + | + | - | +  |
| HPA28  | <i>A. johnsonii</i>                           | + | + | - | +  |
| AJ11   | <i>A. junii</i>                               | + | + | - | +  |
| AJ30   | <i>A. junii</i>                               | + | + | - | +  |
| AJ31   | <i>A. junii</i>                               | + | + | + | +  |
| AJ33   | <i>A. junii</i>                               | + | + | - | +  |
| AJ34   | <i>A. junii</i>                               | + | + | - | +  |
| AJ35   | <i>A. junii</i>                               | + | + | + | +  |
| HPA7   | <i>A. junii</i>                               | + | + | - | +  |
| HPA19  | <i>A. junii</i>                               | + | + | - | +  |
| AB3    | <i>A. lwoffii</i> / <i>A. genomospecies 9</i> | + | + | - | +  |

|        |                                       |   |   |   |    |
|--------|---------------------------------------|---|---|---|----|
| AL2    | <i>A. lwoffii</i> /A. genomospecies 9 | + | + | - | +  |
| AL5    | <i>A. lwoffii</i> /A. genomospecies 9 | + | + | - | +  |
| AL6    | <i>A. lwoffii</i> /A. genomospecies 9 | + | + | - | +  |
| AL27   | <i>A. lwoffii</i> /A. genomospecies 9 | + | + | - | ND |
| AL23   | <i>A. lwoffii</i> /A. genomospecies 9 | + | + | - | +  |
| AS10   | <i>A. lwoffii</i> /A. genomospecies 9 | + | + | - | +  |
| AS25   | <i>A. lwoffii</i> /A. genomospecies 9 | + | + | - | +  |
| AS27   | <i>A. lwoffii</i> /A. genomospecies 9 | - | - | - | +  |
| AS28   | <i>A. lwoffii</i> /A. genomospecies 9 | + | + | + | +  |
| AS38   | <i>A. lwoffii</i> /A. genomospecies 9 | + | + | + | +  |
| AS43   | <i>A. lwoffii</i> /A. genomospecies 9 | + | + | - | +  |
| AS48   | <i>A. lwoffii</i> /A. genomospecies 9 | + | - | + | ND |
| AS49   | <i>A. lwoffii</i> /A. genomospecies 9 | + | + | - | +  |
| AS50   | <i>A. lwoffii</i> /A. genomospecies 9 | + | + | - | +  |
| AS51   | <i>A. lwoffii</i> /A. genomospecies 9 | - | - | - | ND |
| AS52   | <i>A. lwoffii</i> /A. genomospecies 9 | + | + | + | +  |
| AS53   | <i>A. lwoffii</i> /A. genomospecies 9 | + | + | - | +  |
| AS54   | <i>A. lwoffii</i> /A. genomospecies 9 | + | + | - | +  |
| AS55   | <i>A. lwoffii</i> /A. genomospecies 9 | + | + | + | +  |
| AS56   | <i>A. lwoffii</i> /A. genomospecies 9 | + | + | - | +  |
| AS57   | <i>A. lwoffii</i> /A. genomospecies 9 | + | + | - | +  |
| AS58   | <i>A. lwoffii</i> /A. genomospecies 9 | + | + | - | +  |
| AS59   | <i>A. lwoffii</i> /A. genomospecies 9 | + | + | - | +  |
| KR1773 | <i>A. lwoffii</i> /A. genomospecies 9 | + | + | - | +  |
| KR1776 | <i>A. lwoffii</i> /A. genomospecies 9 | - | - | - | +  |
| AS61   | <i>A. lwoffii</i> /A. genomospecies 9 | + | + | - | +  |
| HPA12  | <i>A. lwoffii</i> /A. genomospecies 9 | + | + | - | +  |
| HPA13  | <i>A. lwoffii</i> /A. genomospecies 9 | + | - | + | +  |
| HPA4   | <i>A. nosocomialis</i> sp. nov.       | - | - | - | +  |
| HPA27  | <i>A. nosocomialis</i> sp. nov.       | - | - | - | +  |
| AL40   | <i>A. parvus</i>                      | + | + | - | +  |
| AS62   | <i>A. parvus</i>                      | + | + | - | +  |
| AS63   | <i>A. parvus</i>                      | - | - | - | +  |
| A164   | <i>A. pittii</i> sp. nov.             | - | - | - | +  |
| A215   | <i>A. pittii</i> sp. nov.             | - | - | - | +  |
| A376   | <i>A. pittii</i> sp. nov.             | - | - | - | +  |
| AB8    | <i>A. pittii</i> sp. nov.             | - | - | + | +  |
| AB12   | <i>A. pittii</i> sp. nov.             | - | - | - | +  |
| HPA5   | <i>A. pittii</i> sp. nov.             | - | - | - | +  |
| HPA32  | <i>A. pittii</i> sp. nov.             | - | - | - | +  |
| AS64   | <i>A. radioresistens</i>              | - | - | + | +  |
| HPA2   | <i>A. radioresistens</i>              | - | - | - | +  |
| HPA33  | <i>A. radioresistens</i>              | + | + | - | +  |
| AS65   | <i>A. schindleri</i>                  | + | - | + | +  |
| HPA20  | <i>A. schindleri</i>                  | - | - | - | +  |
| HPA31  | <i>A. schindleri</i>                  | - | - | - | +  |
| AS26   | <i>A. ursingii</i>                    | + | + | - | +  |
| HPA25A | <i>A. ursingii</i>                    | - | - | - | +  |
| HPA15  | <i>A. ursingii</i>                    | - | - | - | +  |
| HPA9   | <i>A. ursingii</i>                    | - | - | - | +  |

|        |                          |   |   |   |   |
|--------|--------------------------|---|---|---|---|
| AS4    | <i>A. ursingii</i> group | - | - | - | + |
| AS39   | <i>A. ursingii</i> group | - | - | + | + |
| KR1778 | <i>A. ursingii</i> group | - | - | - | + |

<sup>a</sup> The following PCR primers were used: *tnp*<sub>ISAb<sub>a</sub>11</sub>, tnp-F/tnp-R; ISAb<sub>a</sub>11, ISAb<sub>a</sub>11-F/ISAb<sub>a</sub>11-R; *tniA*, tniAF/tniA; *rpoB*, Ac696F/Ac1093R. The *tnp*<sub>ISAb<sub>a</sub>11</sub>-primers amplify a 300 bp internal segment of ISAb<sub>a</sub>11, while the ISAb<sub>a</sub>11-primers amplify the entire 1101 bp element. *rpoB* PCR amplicons were sequenced to inform about speciation. ND, not done.

**Table S3. IS*Aba11* and Tn*AbaR* PCR survey results for the 48 genome sequences representative of  $\geq 9$  *Acinetobacter* species investigated by BlastN and *in silico* PCR analysis in this study**

| Strain      | Species                              | <i>tnp</i> <sub>IS<i>Aba11</i></sub> <sup>a</sup> | IS <i>Aba11</i> <sup>a</sup> | <i>tniA</i> <sup>a</sup> | Genome status | GenBank accession no. |
|-------------|--------------------------------------|---------------------------------------------------|------------------------------|--------------------------|---------------|-----------------------|
| 1656-2      | <i>A. baumannii</i>                  | -                                                 | -                            | +                        | assembled     | CP001921              |
| 3909        | <i>A. baumannii</i>                  | -                                                 | -                            | -                        | not assembled | AEOZ00000000          |
| 3990        | <i>A. baumannii</i>                  | -                                                 | -                            | -                        | not assembled | AEOY00000000          |
| 4190        | <i>A. baumannii</i>                  | -                                                 | -                            | -                        | not assembled | AEPA00000000          |
| 6013113     | <i>A. baumannii</i>                  | +                                                 | -                            | -                        | not assembled | ACYR02000038          |
| 6014059     | <i>A. baumannii</i>                  | -                                                 | -                            | +                        | not assembled | ACYS02000127          |
| A118        | <i>A. baumannii</i>                  | -                                                 | -                            | -                        | not assembled | AEOW00000000          |
| AB0057      | <i>A. baumannii</i>                  | -                                                 | -                            | +                        | assembled     | CP001182              |
| AB056       | <i>A. baumannii</i>                  | -                                                 | -                            | +                        | not assembled | ADGZ01000825          |
| AB058       | <i>A. baumannii</i>                  | -                                                 | -                            | +                        | not assembled | ADHA01000065          |
| AB059       | <i>A. baumannii</i>                  | -                                                 | -                            | +                        | not assembled | ADHB01000787          |
| AB210       | <i>A. baumannii</i>                  | -                                                 | -                            | +                        | not assembled | AEOX01000067          |
| AB307-0294  | <i>A. baumannii</i>                  | -                                                 | -                            | -                        | assembled     | CP001172              |
| AB900       | <i>A. baumannii</i>                  | -                                                 | -                            | -                        | not assembled | ABXK00000000          |
| ABNIH1      | <i>A. baumannii</i>                  | -                                                 | -                            | -                        | not assembled | AFSZ00000000          |
| ABNIH2      | <i>A. baumannii</i>                  | -                                                 | -                            | +                        | not assembled | AFTA01000065          |
| ABNIH3      | <i>A. baumannii</i>                  | -                                                 | -                            | +                        | not assembled | AFTB01000233          |
| ABNIH4      | <i>A. baumannii</i>                  | -                                                 | -                            | -                        | not assembled | AFTC00000000          |
| ACICU       | <i>A. baumannii</i>                  | -                                                 | -                            | -                        | assembled     | CP000863              |
| ATCC 17978  | <i>A. baumannii</i>                  | +                                                 | +                            | +                        | not assembled | CP000521              |
| ATCC 19606  | <i>A. baumannii</i>                  | +                                                 | +                            | -                        | not assembled | ACQB00000000          |
| AYE         | <i>A. baumannii</i>                  | -                                                 | -                            | +                        | assembled     | CU459141              |
| D1279779    | <i>A. baumannii</i>                  | -                                                 | -                            | -                        | not assembled | AERZ00000000          |
| DR1         | <i>A. baumannii</i>                  | -                                                 | -                            | -                        | assembled     | CP002080              |
| MDR-TJ      | <i>A. baumannii</i>                  | -                                                 | -                            | +                        | assembled     | AEOE01000001          |
| MDR-ZJ06    | <i>A. baumannii</i>                  | -                                                 | -                            | +                        | assembled     | CP001937              |
| Naval-18    | <i>A. baumannii</i>                  | -                                                 | -                            | +                        | assembled     | AFDA01000030          |
| Naval-81    | <i>A. baumannii</i>                  | -                                                 | -                            | -                        | not assembled | AFDB00000000          |
| OIFC032     | <i>A. baumannii</i>                  | -                                                 | -                            | +                        | not assembled | AFCZ01000012          |
| SDF         | <i>A. baumannii</i>                  | -                                                 | -                            | -                        | assembled     | CU468230              |
| TCDC-AB0715 | <i>A. baumannii</i>                  | -                                                 | -                            | +                        | assembled     | CP002522              |
| UMB001      | <i>A. baumannii</i>                  | -                                                 | -                            | -                        | not assembled | AEBK00000000          |
| UMB002      | <i>A. baumannii</i>                  | -                                                 | -                            | -                        | not assembled | AEBL00000000          |
| UMB003      | <i>A. baumannii</i>                  | -                                                 | -                            | -                        | not assembled | AEBM00000000          |
| WM99c       | <i>A. baumannii</i>                  | -                                                 | -                            | +                        | not assembled | AERY01000108          |
| PHEA-2      | <i>A. calcoaceticus</i>              | -                                                 | -                            | -                        | assembled     | CP002177              |
| RUH2202     | <i>A. calcoaceticus</i>              | -                                                 | -                            | -                        | not assembled | ABCK00000000          |
| ATCC 19194  | <i>A. haemolyticus</i>               | +                                                 | -                            | -                        | not assembled | ADMT01000000          |
| ATCC 27244  | <i>A. haemolyticus</i>               | +                                                 | -                            | -                        | not assembled | ABYN01000000          |
| ADP1        | <i>A. johnsonii</i>                  | -                                                 | -                            | -                        | assembled     | CR543861              |
| SH046       | <i>A. johnsonii</i>                  | +                                                 | -                            | -                        | not assembled | ACPL01000000          |
| SH205       | <i>A. junii</i>                      | -                                                 | -                            | -                        | not assembled | ACPM00000000          |
| SH145       | <i>A. lwoffii/A. genomospecies 9</i> | +                                                 | +                            | -                        | not assembled | ACPN01000000          |
| WJ10621     | <i>A. lwoffii/A. genomospecies 9</i> | +                                                 | +                            | -                        | not assembled | AFQY01000001          |
| SH024       | <i>A. pittii</i> sp. nov.            | -                                                 | -                            | -                        | not assembled | ADCH00000000          |
| RUH2624     | <i>A. nosocomialis</i> sp. nov.      | -                                                 | -                            | -                        | not assembled | ACQF00000000          |
| SH164       | <i>A. radioresistens</i>             | -                                                 | -                            | -                        | not assembled | ACPO00000000          |
| SK82        | <i>A. radioresistens</i>             | -                                                 | -                            | -                        | not assembled | ACVR00000000          |

<sup>a</sup> The following PCR primers were used: *tnp*<sub>IS*Aba11*</sub>, *tnp*-F/*tnp*-R; IS*Aba11*, IS*Aba11*-F/ IS*Aba11*-R; *tniA*, *tniA*F/*tniA*R.

**Table S4.** Primers used in this study

| Name        | Sequence 5'-3'                                          | Source               | Target (Purpose)                    |
|-------------|---------------------------------------------------------|----------------------|-------------------------------------|
| tniA-R2     | CGAAGACGACAGCAGGTACA                                    | This study           | <i>tniA</i> junction                |
| tnp-F       | CAAAGATCCCCTCAAACCTGG                                   | This study           | <i>tnp<sub>ISAbal1</sub></i>        |
| tnp-R       | ATCAGGGTCAAGTGGTCTGG                                    | This study           |                                     |
| orf1-F      | GTTTGAATCGACCCCTTGAGC                                   | This study           | Tn <i>AbaR orf1</i>                 |
| orf1-R      | CCCTCATAACCGACAACCAC                                    | This study           |                                     |
| Gm-F-BamHI  | CG <b>GGATCC</b> GAATTAGCTTCAAAGCGCTCTGA <sup>a</sup>   | This study           | <i>aacC1</i> cassette               |
| Gm-R-BamHI  | CG <b>GGATCC</b> GAATTGGGGATCTTGAAGTTCCT <sup>a</sup>   | This study           |                                     |
| ISAbal1-F   | TAGGACTTACGCATTGACG                                     | This study           | IS <i>Abal1</i>                     |
| ISAbal1-R   | TAGGACTTACGCACTATCATTAT                                 | This study           |                                     |
| ISAbal1-InF | CG <b>GGATCC</b> TCATTTATAGATTCTCTGTGGTAGC <sup>a</sup> | This study           | pDSIS <i>Abal1</i><br>(inverse-PCR) |
| ISAbal1-InR | CG <b>GGATCC</b> AGTGCCTAAGTCTACATATAATC <sup>a</sup>   | This study           |                                     |
| DFISAbal1-1 | GTAGGCCATCAAGGCTGAAA                                    | This study           | IS <i>Abal1</i><br>(walking)        |
| DFISAbal1-2 | GGCAAGTTGTGTGCAGCTAA                                    | This study           |                                     |
| pDS-F       | GGAACACTTAACGGCTGAC                                     | This study           | pDS junctions                       |
| pDS-R       | GGATCGATCCTCTCAGAGTC                                    | This study           |                                     |
| sacB-F      | CGGCATTTTCTTTTGCCTTT                                    | Kochar <i>et al.</i> | <i>sacB</i>                         |
| sacB-R      | AGGAACCTCAAGATCCCCAATTCGTCTTTAGGCC<br>CGTAGTCTGC        | Kochar <i>et al.</i> |                                     |
| 4R          | AATCGATGCGGTCGAGTAAC                                    | (8)                  | <i>comM</i><br>junction             |
| aacC1F      | GACATAAGCCTGTTTCGGTT                                    | (4)                  | <i>aacC1</i>                        |
| aacC1R      | CTCCGAACCTCACGACCGA                                     | (4)                  |                                     |
| oxa51a      | CTAATAATTGATCTACTCAAG                                   | (6)                  | <i>bla<sub>OXA-51-like</sub></i>    |
| oxa51b      | CCAGTGGATGGATGGATAGATTATC                               | (6)                  |                                     |
| Ac696F      | TAYCGYAAAGAYTTGAAAGAAG                                  | (2)                  | <i>rpoB</i>                         |
| Ac1093R     | CMACACCYTTGTTMCCRTGA                                    | (2)                  |                                     |
| tniAF       | CATCCCCAATCGTTAAATGG                                    | (7)                  | <i>tniA</i>                         |
| tniAR       | TTTTCTTTTRCGCTTTCGAT                                    | (7)                  |                                     |

<sup>a</sup> Residues shown in bold correspond to primer-incorporated *Bam*HI sites.

**Table S5. Results of genomic walking analysis on eleven IS*Aba11*-positive *Acinetobacter* spp. strains <sup>a</sup>**

| GenBank accession no.<br><sup>b</sup> | Species                    | Strain     | TIR <sup>c</sup> | Length of non-IS <i>Aba11</i> sequence | Target gene (site) /protein                                    | Species (strain)                      | GenBank ID   | Identity BlastX | Identity BlastN |
|---------------------------------------|----------------------------|------------|------------------|----------------------------------------|----------------------------------------------------------------|---------------------------------------|--------------|-----------------|-----------------|
| JN819186                              | <i>A. baumannii</i>        | ATCC 19606 | IRL              | 699 bp                                 | Upstream of HMPREF0010_03298/<br>hypothetical protein          | <i>A. baumannii</i><br>ATCC 19606     | EEX02178     | 99%             | 99%             |
| JN819187                              | <i>A. baumannii</i>        | ATCC 19606 | IRR              | 232 bp                                 | Upstream of HMPREF0010_03297/<br>phospholipase C               | <i>A. baumannii</i><br>ATCC 19606     | ZP_05829914  | 97%             | 98%             |
| JN819188                              | <i>A. baumannii</i>        | A479       | IRL              | 792 bp                                 | IS <i>Aba1</i>                                                 | <i>A. baumannii</i> AYE               | YP_001712482 | 100%            | 100%            |
| JN819189                              | <i>A. baumannii</i>        | A479       | IRR              | 549 bp                                 | AB57_3457/enoyl-CoA hydratase                                  | <i>A. baumannii</i> AYE               | YP_002320761 | 98%             | 99%             |
| JN819190                              | <i>A. junii</i>            | AJ11       | IRL              | 802 bp                                 | Upstream of HMPREF0026_01257/<br>hypothetical protein          | <i>A. junii</i> SH206                 | EEY93981     | 100%            | 100%            |
| JN819191                              | <i>A. lwoffii/A. gs. 9</i> | AL1        | IRL              | 256 bp                                 | Upstream of HMPREF0017_01038/<br>quinone oxidoreductase        | <i>A. lwoffii/A. gs. 9</i><br>SH145   | EEY90112     | 100%            | 100%            |
| JN819193                              | <i>A. lwoffii/A. gs. 9</i> | AL2        | IRR              | 368 bp                                 | Upstream of HMPREF0017_02635/<br>sulfite reductase             | <i>A. lwoffii/A. gs. 9</i><br>SH145   | EEY88689     | 100%            | 100%            |
| JN819192                              | <i>A. lwoffii/A. gs. 9</i> | AL2        | IRL              | 557 bp                                 | HMPREF0017_02339<br>/membrane protein                          | <i>A. lwoffii/A. gs. 9</i><br>SH145   | EEY89069     | 97%             | 90%             |
| JN819194                              | <i>A. lwoffii/A. gs. 9</i> | AL5        | IRR              | 308 bp                                 | HMPREF0026_02009/<br>transposase                               | <i>A. junii</i> SH205                 | ZP_06066902  | 98%             | 97%             |
| JN819195                              | <i>A. lwoffii/A. gs. 9</i> | AL5        | IRL              | 536 bp                                 | HMPREF0017_01092/<br>esterase                                  | <i>A. lwoffii/A. gs. 9</i><br>SH145   | EEY90166     | 96%             | 97%             |
| JN819198                              | <i>A. lwoffii/A. gs. 9</i> | AS25       | IRL              | 135 bp                                 | NA                                                             | <i>A. lwoffii/A. gs. 9</i><br>WJ10621 | AFQY01000001 | NA              | 95%             |
| JN819196                              | <i>A. lwoffii/A. gs. 9</i> | AS10       | IRR              | 472 bp                                 | Downstream of HMPREF0017_00131/<br>phosphate acetyltransferase | <i>A. lwoffii/A. gs. 9</i><br>SH145   | EEY91118     | 99%             | 90%             |
| JN819197                              | <i>A. lwoffii/A. gs. 9</i> | AS10       | IRL              | 368 bp                                 | HMPREF0017_01411/<br>RNA helicase                              | <i>A. lwoffii/A. gs. 9</i><br>SH145   | EEY89994     | 98%             | 92%             |



|          |                     |          |          |         |                                                |                                 |           |      |      |
|----------|---------------------|----------|----------|---------|------------------------------------------------|---------------------------------|-----------|------|------|
| JN819199 | <i>A. baumannii</i> | A424-BR3 | IRR, IRL | 678 bp  | pMMA2_02/TonB-dependent receptor               | <i>A. baumannii</i> AYE         | ACV72167  | 98%  | 100% |
| JN819200 | <i>A. baumannii</i> | A424-BR2 | IRR, IRL | 1717 bp | Downstream of ABAYE2100/<br>ABC efflux protein | <i>A. baumannii</i> AYE         | CAM86974  | 100% | 100% |
| JN819201 | <i>A. baumannii</i> | A424-BR1 | IRR, IRL | 1502 bp | Upstream of FG00266.1/<br>hypothetical protein | <i>Gibbersella zeae</i><br>PH-1 | XP_380442 | 26%  | NS   |

<sup>a</sup> NA, not applicable; NS, not significant; gs., genomospecies. <sup>b</sup> Genomic walking sequence data generated in this study has been deposited with GenBank and is available via the accession numbers listed. <sup>c</sup> Flanking sequence data was generated for the TIR end shown.

## REFERENCES

1. **Choi, K. H., J. B. Gaynor, K. G. White, C. Lopez, C. M. Bosio, R. R. Karkhoff-Schweizer, and H. P. Schweizer.** 2005. A Tn7-based broad-range bacterial cloning and expression system. *Nat Methods* **2**:443-8.
2. **Gundi, V. A., L. Dijkshoorn, S. Burignat, D. Raoult, and B. La Scola.** 2009. Validation of partial *rpoB* gene sequence analysis for the identification of clinically important and emerging *Acinetobacter* species. *Microbiology* **155**:2333-41.
3. **Herrero, M., V. de Lorenzo, and K. N. Timmis.** 1990. Transposon vectors containing non-antibiotic resistance selection markers for cloning and stable chromosomal insertion of foreign genes in gram-negative bacteria. *J Bacteriol* **172**:6557-67.
4. **Noppe-Leclercq, I., F. Wallet, S. Haentjens, R. Courcol, and M. Simonet.** 1999. PCR detection of aminoglycoside resistance genes: a rapid molecular typing method for *Acinetobacter baumannii*. *Res Microbiol* **150**:317-22.
5. **Philippe, N., J. P. Alcaraz, E. Coursange, J. Geiselmann, and D. Schneider.** 2004. Improvement of pCVD442, a suicide plasmid for gene allele exchange in bacteria. *Plasmid* **51**:246-55.
6. **Queenan, A. M., and K. Bush.** 2007. Carbapenemases: the versatile beta-lactamases. *Clin Microbiol Rev* **20**:440-58.
7. **Rose, A.** 2010. Tn*AbaRI*: a novel Tn7-related transposon in *Acinetobacter baumannii* that contributes to the accumulation and dissemination of large repertoires of resistance genes. *Bioscience Horizons*:1-9.
8. **Shaikh, F., R. P. Spence, K. Levi, H. Y. Ou, Z. Deng, K. J. Towner, and K. Rajakumar.** 2009. ATPase genes of diverse multidrug-resistant *Acinetobacter baumannii* isolates frequently harbour integrated DNA. *J Antimicrob Chemother* **63**:260-4.
9. **Skorupski, K., and R. K. Taylor.** 1996. Positive selection vectors for allelic exchange. *Gene* **169**:47-52.
